# Supplementary material for: A Novel, Multiple-Antigen Pneumococcal Vaccine Protects against Lethal Streptococcus pneumoniae Challenge
Source: PubMed Central journal article supplement (PMC6386546; doi:10.1128/iai.00846-18), 2019-02-21
Supplement: IAI.00846-18-s0001.pdf [file IAI.00846-18-s0001.pdf]

## Supplementary Table 1

All proteins that iTRAQ analyses show have increased expression in the MAV TIGR4.1 compared to the TIGR4 HKL preparation

| SP #    | Protein                                          | Fold change |
|---------|--------------------------------------------------|-------------|
| SP_0082 | Cell wall surface anchor family protein (PavB)   | 5.33        |
| SP_0148 | ABC transporter, substrate-binding protein       | 3.10        |
| SP_0149 | Lipoprotein                                      | 2.52        |
| SP_0285 | Alcohol dehydrogenase, zinc-containing           | 2.90        |
| SP_0338 | Putative ATP-dependent Clp protease, ATP-binding | 2.67        |
| SP_0409 | Putative uncharacterized protein                 | 2.96        |
| SP_0447 | Ketol-acid reductoisomerase (IlvC)               | 2.66        |
| SP_0466 | Putative sortase                                 | 3.42        |
| SP_0516 | Protein GrpE (GrpE)                              | 3.03        |
| SP_0517 | Chaperone protein (DnaK)                         | 4.33        |
| SP_0629 | Putative uncharacterized protein                 | 3.94        |
| SP_0641 | Serine protease, subtilase family                | 3.12        |
| SP_1027 | Putative uncharacterized protein                 | 3.12        |
| SP_1190 | Tagatose 1,6-diphosphate aldolase (LacD)         | 4.74        |
| SP_1192 | Galactose-6-phosphate isomerase subunit (LacB)   | 3.13        |
| SP_1415 | Glucosamine-6-phosphate deaminase (NagB)         | 2.62        |
| SP_1572 | Non-heme iron-containing ferritin                | 2.6         |
| SP_1650 | Manganese ABC transporter lipoprotein (PsaA)     | 4.03        |
| SP_1676 | Putative N-acetylneuraminase lyase               | 3.06        |
| SP_1775 | Conserved domain protein                         | 2.79        |
| SP_1776 | Thioredoxin (Trx)                                | 2.96        |
| SP_1906 | 60 kDa chaperonin (GroL)                         | 2.95        |

| <b>Supplementary Table 1 continued</b> |                                                       |                    |
|----------------------------------------|-------------------------------------------------------|--------------------|
| <b>SP #</b>                            | <b>Protein</b>                                        | <b>Fold change</b> |
| SP_1907                                | 10 kDa chaperonin (GroS)                              | 3.56               |
| SP_2055                                | Alcohol dehydrogenase, zinc-containing                | 3.46               |
| SP_2056                                | N-acetylglucosamine-6-phosphate deacetylase           | 3.24               |
| SP_2093                                | Putative uncharacterized protein                      | 2.78               |
| SP_2108                                | Maltose/maltodextrin-binding protein (MalX)           | 3.19               |
| SP_2239                                | Serine protease                                       | 3.29               |
| SP_1069                                | Putative uncharacterized protein                      | 2.51               |
| SP_2126                                | Dihydroxy-acid dehydratase (IlvD)                     | 2.48               |
| SP_0519                                | Chaperone protein (DnaJ)                              | 2.37               |
| SP_0845                                | Lipoprotein                                           | 2.37               |
| SP_1500                                | Amino acid ABC transporter, (AatB)                    | 2.37               |
| SP_1527                                | Oligopeptide-binding protein (AliB)                   | 2.33               |
| SP_0771                                | Peptidyl-prolyl cis-trans isomerase, cyclophilin-type | 2.31               |
| SP_1683                                | Sugar ABC transporter, sugar-binding protein          | 2.3                |
| SP_0899                                | Putative uncharacterized protein                      | 2.26               |
| SP_2070                                | Glucose-6-phosphate isomerase (Pgi)                   | 2.24               |
| SP_1032                                | Iron-compound ABC transporter                         | 2.22               |
| SP_0736                                | Mannose-6-phosphate isomerase (ManA)                  | 2.22               |
| SP_0520                                | Putative uncharacterized protein                      | 2.21               |
| SP_0605                                | Fructose-bisphosphate aldolase (Fba)                  | 2.20               |
| SP_2197                                | Putative ABC transporter, substrate-binding protein   | 2.17               |
| SP_0236                                | DNA-directed RNA polymerase subunit alpha (RpoA)      | 2.17               |
| SP_0372                                | Cell cycle protein GpsB (GpsB)                        | 2.16               |
| SP_0673                                | Putative uncharacterized protein                      | 2.15               |
| SP_1465                                | Putative uncharacterized protein                      | 2.12               |

| <b>Supplementary Table 1 continued</b> |                                                      |                    |
|----------------------------------------|------------------------------------------------------|--------------------|
| <b>SP #</b>                            | <b>Protein</b>                                       | <b>Fold change</b> |
| SP_1996                                | Universal stress protein                             | 2.11               |
| SP_0374                                | Putative uncharacterized protein                     | 2.11               |
| SP_1177                                | Phosphocarrier protein HPr (PtsH)                    | 2.10               |
| SP_1541                                | 30S ribosomal protein S6 (RpsF)                      | 2.09               |
| SP_0499                                | Phosphoglycerate kinase (Pgk)                        | 2.06               |
| SP_1799                                | Sugar-binding transcriptional regulator, LacI family | 2.04               |
| SP_0784                                | Glutathione reductase (Gor)                          | 2.03               |
| SP_0231                                | Adenylate kinase (Adk)                               | 2.03               |
| SP_1372                                | UPF0342 protein SP_1372                              | 2.02               |
| SP_2210                                | Cysteine synthase (CysM)                             | 2.01               |

Only proteins with an increased fold change of 2 and above are shown

## Supplementary Table 2

All proteins that iTRAQ analyses show have decreased expression in the MAV TIGR4.1 compared to the TIGR4 HKL preparation

| SP #    | Protein                                                | Fold change |
|---------|--------------------------------------------------------|-------------|
| SP_0019 | Adenylosuccinate synthetase (PurA)                     | -4.00       |
| SP_0032 | DNA polymerase I (PolA)                                | -2.58       |
| SP_0035 | Aromatic amino acid aminotransferase (AraT)            | -2.10       |
| SP_0071 | Zinc metalloprotease ZmpC (ZmpC)                       | -2.51       |
| SP_0085 | 30S ribosomal protein S4 (RpsD)                        | -2.56       |
| SP_0095 | UPF0176 protein                                        | -3.09       |
| SP_0103 | Putative capsular polysaccharide biosynthesis          | -5.17       |
| SP_0117 | Pneumococcal surface protein A (PspA)                  | -2.64       |
| SP_0121 | Metallo-beta-lactamase superfamily protein             | -2.64       |
| SP_0151 | Methionine import ATP-binding protein MetN             | -2.95       |
| SP_0176 | Riboflavin biosynthesis protein RibBA                  | -3.77       |
| SP_0186 | UvrABC system protein A (UvrA)                         | -2.80       |
| SP_0202 | Anaerobic ribonucleoside-triphosphate reductase (NrdD) | -2.59       |
| SP_0208 | 30S ribosomal protein S10                              | -4.15       |
| SP_0211 | 50S ribosomal protein L23 (RplW)                       | -2.31       |
| SP_0212 | 50S ribosomal protein L2 (RplB)                        | -2.90       |
| SP_0215 | 30S ribosomal protein S3                               | -4.99       |
| SP_0216 | 50S ribosomal protein L16                              | -6.35       |
| SP_0217 | 50S ribosomal protein L29 (RpmC)                       | -23.94      |
| SP_0219 | 50S ribosomal protein L14 (RplN)                       | -2.67       |
| SP_0220 | 50S ribosomal protein L24                              | -3.69       |

| <b>Supplementary Table 2 continued</b> |                                                      |                    |
|----------------------------------------|------------------------------------------------------|--------------------|
| <b>SP #</b>                            | <b>Protein</b>                                       | <b>Fold change</b> |
| SP_0221                                | 50S ribosomal protein L5                             | -2.08              |
| SP_0222                                | 30S ribosomal protein S14 (RpsN)                     | -6.22              |
| SP_0224                                | 30S ribosomal protein S8                             | -4.16              |
| SP_0225                                | 50S ribosomal protein L6                             | -4.88              |
| SP_0226                                | 50S ribosomal protein L18 (RplR)                     | -2.64              |
| SP_0228                                | 50S ribosomal protein L30                            | -8.27              |
| SP_0229                                | 50S ribosomal protein L15                            | -4.51              |
| SP_0232                                | Translation initiation factor IF-1                   | -14.61             |
| SP_0234                                | 30S ribosomal protein S13 (RpsM )                    | -2.09              |
| SP_0264                                | Proline-tRNA ligase                                  | -3.10              |
| SP_0266                                | Glutamine--fructose-6-phosphate aminotransferase     | -2.32              |
| SP_0271                                | 30S ribosomal protein S12                            | -4.30              |
| SP_0294                                | 50S ribosomal protein L13 (RplM)                     | -3.07              |
| SP_0350                                | Capsular polysaccharide biosynthesis protein Cps4E   | -3.73              |
| SP_0355                                | Putative uncharacterized protein                     | -4.46              |
| SP_0373                                | Putative uncharacterized protein                     | -2.30              |
| SP_0413                                | Aspartokinase                                        | -2.21              |
| SP_0425                                | Acetyl-CoA carboxylase, biotin carboxylase (AccC)    | -2.61              |
| SP_0433                                | N utilization substance protein B homolog (NusB)     | -2.43              |
| SP_0439                                | Peptide chain release factor 3                       | -4.06              |
| SP_0441                                | 50S ribosomal protein L28                            | -3.80              |
| SP_0443                                | Putative uncharacterized protein                     | -2.34              |
| SP_0451                                | Putative uncharacterized protein                     | -2.92              |
| SP_0493                                | Probable DNA-directed RNA polymerase $\delta$ (RpoE) | -5.46              |
| SP_0494                                | CTP synthase (PyrG)                                  | -2.76              |

| <b>Supplementary Table 2 continued</b> |                                                                       |                    |
|----------------------------------------|-----------------------------------------------------------------------|--------------------|
| <b>SP #</b>                            | <b>Protein</b>                                                        | <b>Fold change</b> |
| SP_0564                                | Putative uncharacterized protein                                      | -2.72              |
| SP_0613                                | Metallo-beta-lactamase superfamily protein                            | -2.17              |
| SP_0630                                | 50S ribosomal protein L11                                             | -11.89             |
| SP_0631                                | 50S ribosomal protein L1                                              | -7.14              |
| SP_0648                                | Beta-galactosidase (BgaA)                                             | -2.45              |
| SP_0670                                | Putative uncharacterized protein                                      | -4.17              |
| SP_0675                                | Oxidoreductase, short chain dehydrogenase/reductase family            | -2.80              |
| SP_0678                                | Putative uncharacterized                                              | -2.86              |
| SP_0702                                | Orotate phosphoribosyltransferase (PyrE)                              | -2.57              |
| SP_0752                                | Branched-chain amino acid ABC transporter, ATP-binding protein (LivG) | -2.65              |
| SP_0756                                | Cell division ABC transporter, ATP-binding protein FtsE               | -8.59              |
| SP_0761                                | ATP-dependent RNA helicase, DEAD/DEAH box family                      | -2.87              |
| SP_0762                                | S-adenosylmethionine (MetK)                                           | -2.76              |
| SP_0770                                | ABC transporter, ATP-binding protein                                  | -3.08              |
| SP_0780                                | Ribonucleoside-diphosphate reductase, alpha subunit, truncation       | -2.83              |
| SP_0788                                | Methionine-tRNA ligase                                                | -3.87              |
| SP_0801                                | Putative uncharacterized protein                                      | -5.11              |
| SP_0838                                | 30S ribosomal protein S20                                             | -13.86             |
| SP_0846                                | Sugar ABC transporter, ATP-binding protein                            | -2.47              |
| SP_0852                                | DNA topoisomerase 4 subunit B (ParE)                                  | -2.36              |
| SP_0855                                | DNA topoisomerase 4 subunit A (ParC)                                  | -2.70              |
| SP_0861                                | Putative uncharacterized protein                                      | -2.62              |

| <b>Supplementary Table 2 continued</b> |                                                            |                    |
|----------------------------------------|------------------------------------------------------------|--------------------|
| <b>SP #</b>                            | <b>Protein</b>                                             | <b>Fold change</b> |
| SP_0868                                | Putative uncharacterized protein                           | -2.65              |
| SP_0871                                | Putative uncharacterized                                   | -3.67              |
| SP_0875                                | Lactose phosphotransferase system repressor                | -5.18              |
| SP_0876                                | Tagatose-6-phosphate kinase                                | -2.88              |
| SP_0877                                | PTS system, fructose specific II ABC components            | -3.59              |
| SP_0897                                | Pyruvate kinase (Pyk)                                      | -2.18              |
| SP_0908                                | Putative transcriptional regulator                         | -3.82              |
| SP_0923                                | Cof family protein                                         | -2.04              |
| SP_0929                                | Pseudouridine synthase (RluD)                              | -2.10              |
| SP_0959                                | Translation initiation factor IF-3                         | -3.87              |
| SP_0964                                | Dihydroorotate dehydrogenase B (NAD(+)), (PyrDB)           | -6.16              |
| SP_0969                                | GTPase Era                                                 | -2.36              |
| SP_0985                                | Cys-tRNA(Pro)/Cys-tRNA(Cys) deacylase                      | -4.53              |
| SP_1010                                | Large conductance mechanosensitive channel protein<br>MscL | -2.35              |
| SP_1025                                | Putative uncharacterized                                   | -2.73              |
| SP_1068                                | Phosphoenolpyruvate carboxylase (Ppc)                      | -2.83              |
| SP_1087                                | ATP-dependent DNA helicase PcrA                            | -3.02              |
| SP_1093                                | Putative uncharacterized protein                           | -5.41              |
| SP_1095                                | Ribose-phosphate pyrophosphokinase 2 (Prs2)                | -2.41              |
| SP_1107                                | 50S ribosomal protein L27                                  | -4.56              |
| SP_1128                                | Enolase                                                    | -2.75              |
| SP_1155                                | Ribosome biogenesis GTPase A                               | -2.01              |
| SP_1182                                | Lactose phosphotransferase system repressor (LacR)         | -2.58              |
| SP_1243                                | Glucose-6-phosphate 1-dehydrogenase (Zwf)                  | -2.14              |

| <b>Supplementary Table 2 continued</b> |                                                               |                    |
|----------------------------------------|---------------------------------------------------------------|--------------------|
| <b>SP #</b>                            | <b>Protein</b>                                                | <b>Fold change</b> |
| SP_1249                                | GMP reductase (GuaC)                                          | -2.56              |
| SP_1267                                | LicC protein                                                  | -2.36              |
| SP_1269                                | Choline kinase (Pck)                                          | -3.63              |
| SP_1270                                | Alcohol dehydrogenase, zinc-containing                        | -5.43              |
| SP_1275                                | Carbamoyl-phosphate synthase large chain                      | -4.89              |
| SP_1276                                | Carbamoyl-phosphate synthase small chain                      | -4.96              |
| SP_1278                                | Bifunctional protein PyrR                                     | -2.61              |
| SP_1293                                | 50S ribosomal protein L19 (RplS)                              | -3.05              |
| SP_1297                                | Flavodoxin (Fld)                                              | -2.25              |
| SP_1362                                | Adapter protein MecA (MecA)                                   | -2.04              |
| SP_1397                                | Phosphate import ATP-binding protein PstB 2                   | -2.51              |
| SP_1421                                | Nicotinate phosphoribosyltransferase                          | -2.83              |
| SP_1475                                | Glycine--tRNA ligase alpha subunit (GlyQ)                     | -2.19              |
| SP_1483                                | ATP-dependent RNA helicase, DEAD/DEAH box family              | -5.25              |
| SP_1510                                | ATP synthase subunit alpha (AtpA)                             | -2.43              |
| SP_1511                                | ATP synthase subunit delta (AtpH)                             | -2.14              |
| SP_1521                                | UDP-N-acetylmuramate--L-alanine ligase (MurC)                 | -2.28              |
| SP_1530                                | UDP-N-acetylmuramoyl-L-alanyl-D-glutamate--L-lysine<br>ligase | -4.26              |
| SP_1538                                | Cof family protein/peptidyl-prolyl cis-trans, cyclophilin     | -2.92              |
| SP_1539                                | 30S ribosomal protein S18 (rpsR)                              | -2.31              |
| SP_1542                                | Asparagine-tRNA ligase                                        | -3.78              |
| SP_1557                                | DegV domain-containing protein                                | -2.65              |
| SP_1573                                | Lysozyme (LytC)                                               | -7.32              |
| SP_1580                                | Sugar ABC transporter, ATP-binding protein (MsmK)             | -2.17              |



| <b>Supplementary Table 2 continued</b> |                                                         |                    |
|----------------------------------------|---------------------------------------------------------|--------------------|
| <b>SP #</b>                            | <b>Protein</b>                                          | <b>Fold change</b> |
| SP_1584                                | GTP-sensing transcriptional pleiotropic repressor CodY  | -4.23              |
| SP_1586                                | Probable ATP-dependent RNA helicase (Exp9)              | -2.36              |
| SP_1631                                | Threonine-tRNA ligase (ThrS)                            | -2.02              |
| SP_1667                                | Cell division protein FtsA                              | -3.04              |
| SP_1674                                | Putative phosphosugar-binding transcriptional regulator | -2.54              |
| SP_1701                                | Phospho-2-dehydro-3-deoxyheptonate aldolase             | -2.54              |
| SP_1702                                | Protein translocase subunit SecA 1                      | -3.05              |
| SP_1737                                | DNA-directed RNA polymerase subunit omega (RpoZ)        | -3.00              |
| SP_1739                                | Ribonuclease Y                                          | -4.23              |
| SP_1749                                | GTP-binding protein                                     | -2.40              |
| SP_1837                                | Putative capsular polysaccharide biosynthesis protein   | -2.96              |
| SP_1853                                | Galactokinase                                           | -10.13             |
| SP_1880                                | Non-canonical purine NTP pyrophosphatase                | -2.73              |
| SP_1882                                | UPF0154 protein                                         | -2.54              |
| SP_1888                                | Oligopeptide transport ATP-binding protein (AmiE)       | -2.18              |
| SP_1894                                | Sucrose phosphorylase (GtfA)                            | -10.14             |
| SP_1923                                | Pneumolysin (Ply)                                       | -2.18              |
| SP_1937                                | Autolysin                                               | -10.98             |
| SP_1940                                | Protein RecA                                            | -2.36              |
| SP_1960                                | DNA-directed RNA polymerase subunit $\beta$             | -4.91              |
| SP_1961                                | DNA-directed RNA polymerase subunit beta (RpoB)         | -3.03              |
| SP_1970                                | Aspartate-ammonia ligase (AsnA)                         | -2.50              |
| SP_1975                                | Membrane protein insertase (YidC1)                      | -2.24              |
| SP_1978                                | Diaminopimelate decarboxylase (LysA)                    | -3.04              |
| SP_1979                                | Pur operon repressor                                    | -7.99              |

| <b>Supplementary Table 2 continued</b> |                                          |                    |
|----------------------------------------|------------------------------------------|--------------------|
| <b>SP #</b>                            | <b>Protein</b>                           | <b>Fold change</b> |
| SP_1999                                | Catabolite control protein A (CcpA)      | -2.62              |
| SP_2030                                | Probable transketolase (Tkt)             | -2.01              |
| SP_2058                                | Queuine tRNA-ribosyltransferase (Tgt)    | -2.80              |
| SP_2076                                | DNA mismatch repair protein HexA         | -2.31              |
| SP_2078                                | Arginine-tRNA ligase (ArgS)              | -2.11              |
| SP_2121                                | Histidine--tRNA ligase                   | -4.39              |
| SP_2135                                | 50S ribosomal protein L33 type 3 (RpmG3) | -3.08              |
| SP_2156                                | SPFH domain/Band 7 family                | -2.81              |
| SP_2190                                | Choline binding protein A (PspC)         | -3.10              |
| SP_2204                                | 50S ribosomal protein L9                 | -4.24              |
| SP_2230                                | ABC transporter, ATP-binding protein     | -3.52              |

Only proteins with a decreased fold change of 2 and above are shown
